# Supplementary material for: Effects of rikkunshito on renal fibrosis and inflammation in angiotensin II-infused mice
Source: PubMed Central journal article supplement (PMC6470237; doi:10.1038/s41598-019-42657-1), 2019-04-17
Supplement: 41598_2019_42657_MOESM1_ESM.pdf [file 41598_2019_42657_MOESM1_ESM.pdf]

## Effects of rikkunshito on renal fibrosis and inflammation in angiotensin II-infused mice

Kengo Azushima<sup>1,2†\*</sup>, Kazushi Uneda<sup>1†</sup>, Hiromichi Wakui<sup>1\*</sup>, Kohji Ohki<sup>1</sup>, Kotaro Haruhara<sup>1</sup>,  
Ryu Kobayashi<sup>1</sup>, Sona Haku<sup>1</sup>, Sho Kinguchi<sup>1</sup>, Takahiro Yamaji<sup>1</sup>, Shintaro Minegishi<sup>1</sup>,  
Tomoaki Ishigami<sup>1</sup>, Akio Yamashita<sup>3</sup> and Kouichi Tamura<sup>1</sup>

† These authors contributed equally to this work.

<sup>1</sup> Department of Medical Science and Cardiorenal Medicine, Yokohama City University  
Graduate School of Medicine, Yokohama, Japan

<sup>2</sup> Cardiovascular and Metabolic Disorders Program, Duke-NUS Medical School, Singapore

<sup>3</sup> Department of Molecular Biology, Yokohama City University Graduate School of Medicine,  
Yokohama, Japan

\* Corresponding authors: Kengo Azushima, M.D., Ph.D. and Hiromichi Wakui, M.D., Ph.D.

Department of Medical Science and Cardiorenal Medicine

Yokohama City University Graduate School of Medicine

3-9 Fukuura, Kanazawa-ku, Yokohama, Japan 236-0004.

Tel.: 81-45-787-2635; Fax: 81-45-701-3738

E-mail: [azushima@yokohama-cu.ac.jp](mailto:azushima@yokohama-cu.ac.jp) or [hiro1234@yokohama-cu.ac.jp](mailto:hiro1234@yokohama-cu.ac.jp)

## Full unedited gel for Figure 5D

GLP-1

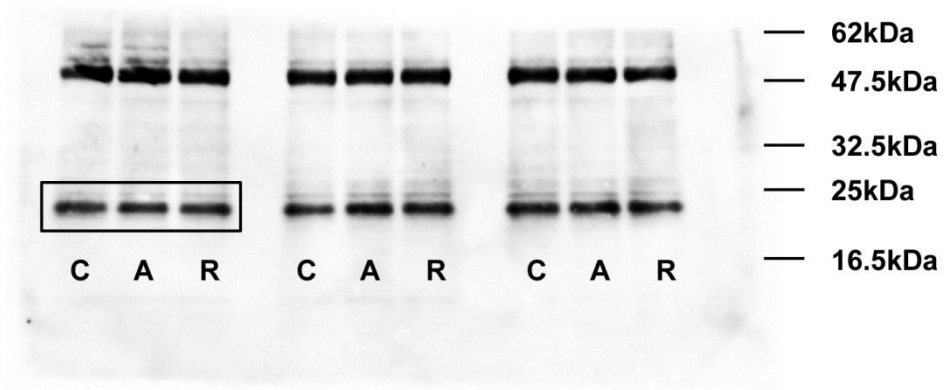

$\beta$ -actin

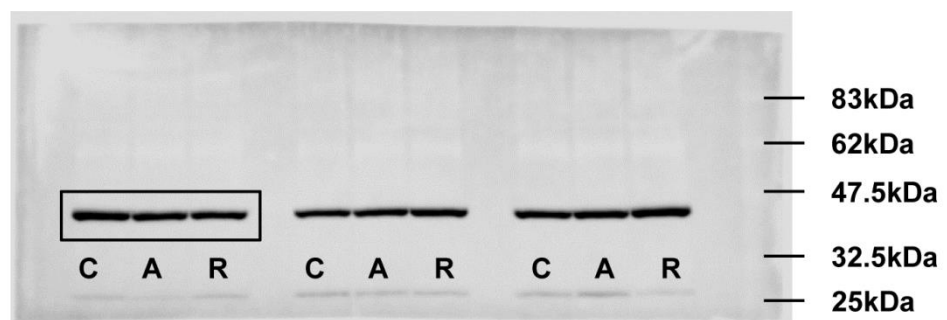

C, Control group; A, Ang II group; R, Ang II + RKT group.
